# Supplementary material
Source: PubMed Central journal article supplement (PMC5851441)
Supplement: NIHMS947065-supplement-Supplementary_Table_1__Adjudication_criteria_for_MAS_cases.pdf [file NIHMS947065-supplement-Supplementary_Table_1__Adjudication_criteria_for_MAS_cases.pdf]

Supplementary Table 1: **Adjudication criteria for MAS cases**

| Adjudication                                                          | Evidence                                                                                                                                                                                                                                                                         |
|-----------------------------------------------------------------------|----------------------------------------------------------------------------------------------------------------------------------------------------------------------------------------------------------------------------------------------------------------------------------|
| <b>Canakinumab clinical program [1]</b>                               |                                                                                                                                                                                                                                                                                  |
| Probable                                                              | Clinically consistent with MAS with histologic confirmation, laboratory features or meeting current formal HLH guidelines criteria [2],<br>OR<br>Clinical and laboratory features consistent with MAS but without histologic confirmation or meeting current formal HLH criteria |
| Possible                                                              | Laboratory features consistent with MAS but without clinical features, histologic confirmation, or meeting current formal HLH criteria                                                                                                                                           |
| Unlikely                                                              | Some clinical and/or laboratory features of MAS, but with possible alternative explanation                                                                                                                                                                                       |
| Insufficient information                                              | Insufficient information for adjudication                                                                                                                                                                                                                                        |
| <b>Tocilizumab clinical trials and postmarketing surveillance [3]</b> |                                                                                                                                                                                                                                                                                  |
| Definite                                                              | Clear case of MAS meeting the preliminary MAS diagnostic criteria [4] and/or current formal HLH criteria [2]                                                                                                                                                                     |
| Potential                                                             | Event that could be MAS but other potential diagnoses recorded                                                                                                                                                                                                                   |
| Not MAS                                                               | Event that did not meet the preliminary MAS criteria and other potential diagnoses recorded                                                                                                                                                                                      |
| Insufficient information                                              | Insufficient information for adjudication                                                                                                                                                                                                                                        |

Definitions and associated probability of MAS in patients with sJIA as used in the canakinumab clinical program and tocilizumab phase III clinical trials and postmarketing surveillance in Japan.

Abbreviations: MAS, macrophage activation syndrome; HLH, haemophagocytic lymphohistiocytosis. Modified from Grom, A. A. *et al.* *Arthritis Rheumatol.* 68, 218–228 (2016), © 2016 American College of Rheumatology, with permission.

- Grom, A. A. *et al.* Rate and clinical presentation of macrophage activation syndrome in patients with systemic juvenile idiopathic arthritis treated with canakinumab. *Arthritis Rheumatol.* **68**, 218–228 (2016).
- Henter, J. I. *et al.* HLH-2004: Diagnostic and therapeutic guidelines for hemophagocytic lymphohistiocytosis. *Pediatr. Blood Cancer* **48**, 124–131 (2007).
- Ravelli, A. *et al.* Macrophage activation syndrome in patients with systemic juvenile idiopathic arthritis treated with tocilizumab [abstract A56]. *Arthritis Rheumatol.* **66** (Suppl. S3), S83–S84 (2014).
- Ravelli, A. *et al.* Preliminary diagnostic guidelines for macrophage activation syndrome complicating systemic juvenile idiopathic arthritis. *J. Pediatr.* **146**, 598–604 (2005).
